# Supplementary material for: Decision‐Making in Management of the Complex Trauma Patient: Changing the Mindset of the non‐trauma Surgeon
Source: Springer Nature journal article supplement (doi:10.1007/s00268-018-4460-x), 2018-01-16
Supplement: MOESM3 [file 15371028]

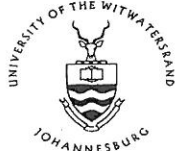

R14/49 Prof Kenneth David Boffard et al

**HUMAN RESEARCH ETHICS COMMITTEE (MEDICAL)**  
**CLEARANCE CERTIFICATE NO. M161113**

**NAME:** Prof Kenneth David Boffard et al  
**(Principal Investigator)**  
**DEPARTMENT:** Surgery  
Netcare Milpark Academic (TSSA Level I) Trauma Centre

**PROJECT TITLE:** Digital Education Models that Support Advanced  
Civilian and Military Traumatology

**DATE CONSIDERED:** 25/11/2016

**DECISION:** Approved unconditionally

**CONDITIONS:**

**SUPERVISOR:**

**APPROVED BY:**   
\_\_\_\_\_  
Professor P Cleaton-Jones, Chairperson, HREC (Medical)

**DATE OF APPROVAL:** 11/01/2017

**This clearance certificate is valid for 5 years from date of approval. Extension may be applied for.**

**DECLARATION OF INVESTIGATORS**

To be completed in duplicate and **ONE COPY** returned to the Research Office Secretary in Room 301, Third Floor, Faculty of Health Sciences, Phillip Tobias Building, 29 Princess of Wales Terrace, Parktown, 2193, University of the Witwatersrand. I/we fully understand the conditions under which I am/we are authorized to carry out the above-mentioned research and I/we undertake to ensure compliance with these conditions. Should any departure be contemplated, from the research protocol as approved, I/we undertake to resubmit the application to the Committee. **I agree to submit a yearly progress report.** The date for annual re-certification will be one year after the date of convened meeting where the study was initially reviewed. In this case, the study was initially reviewed in November and will therefore be due in the month of November each year. Unreported changes to the application may invalidate the clearance given by the HREC (Medical).

\_\_\_\_\_  
Principal Investigator Signature

\_\_\_\_\_  
Date

**PLEASE QUOTE THE PROTOCOL NUMBER IN ALL ENQUIRIES**
